# Supplementary material for: Comparison of Model-Assisted Endogenous Poststratification Methods for Estimation of Above-Ground Biomass Change in Oregon, USA
Source: MDPI journal article supplement (doi:10.3390/rs14236024), 2022-11-28
Supplement: s1 [file s1]

Archive with 1 entries (1 files):
- remotesensing-1999576-supplementary.pdf
